# Supplementary material for: Microparticles in patients undergoing transcatheter aortic valve implantation (TAVI)
Source: Heart Vessels. 2016 Aug 3;32(4):458–66. doi: 10.1007/s00380-016-0885-z (PMC5371631; doi:10.1007/s00380-016-0885-z)
Supplement: Supplementary file 1 — Supplementary Table 1: Additional correlation of EMP and PMP levels with parameters of aortic valve function in echocardiography (XLS 28 kb) [file 380_2016_885_MOESM1_ESM.xls]

## Sheet: Tabelle1
Supplementary Table
		EF	Vmax	MPG	PPG	AVA
CD62E		0.228 *	0.157	0.152	0.196	˗0.035
CD31+CD42b+		0.248 *	0.000	0.046	0.0082	˗0.046
CD31+CD42b-		0.110	0.258 *	0.301 **	0.230 *	˗0.154
CD31+ Annexin+		0.104	0.162	0.226	0.160	˗0.001
CD31+ Annexin-		0.110	0.245 *	0.288 **	0.219 *	˗0.136
